# Supplementary material
Source: PubMed Central journal article supplement (PMC5029119)

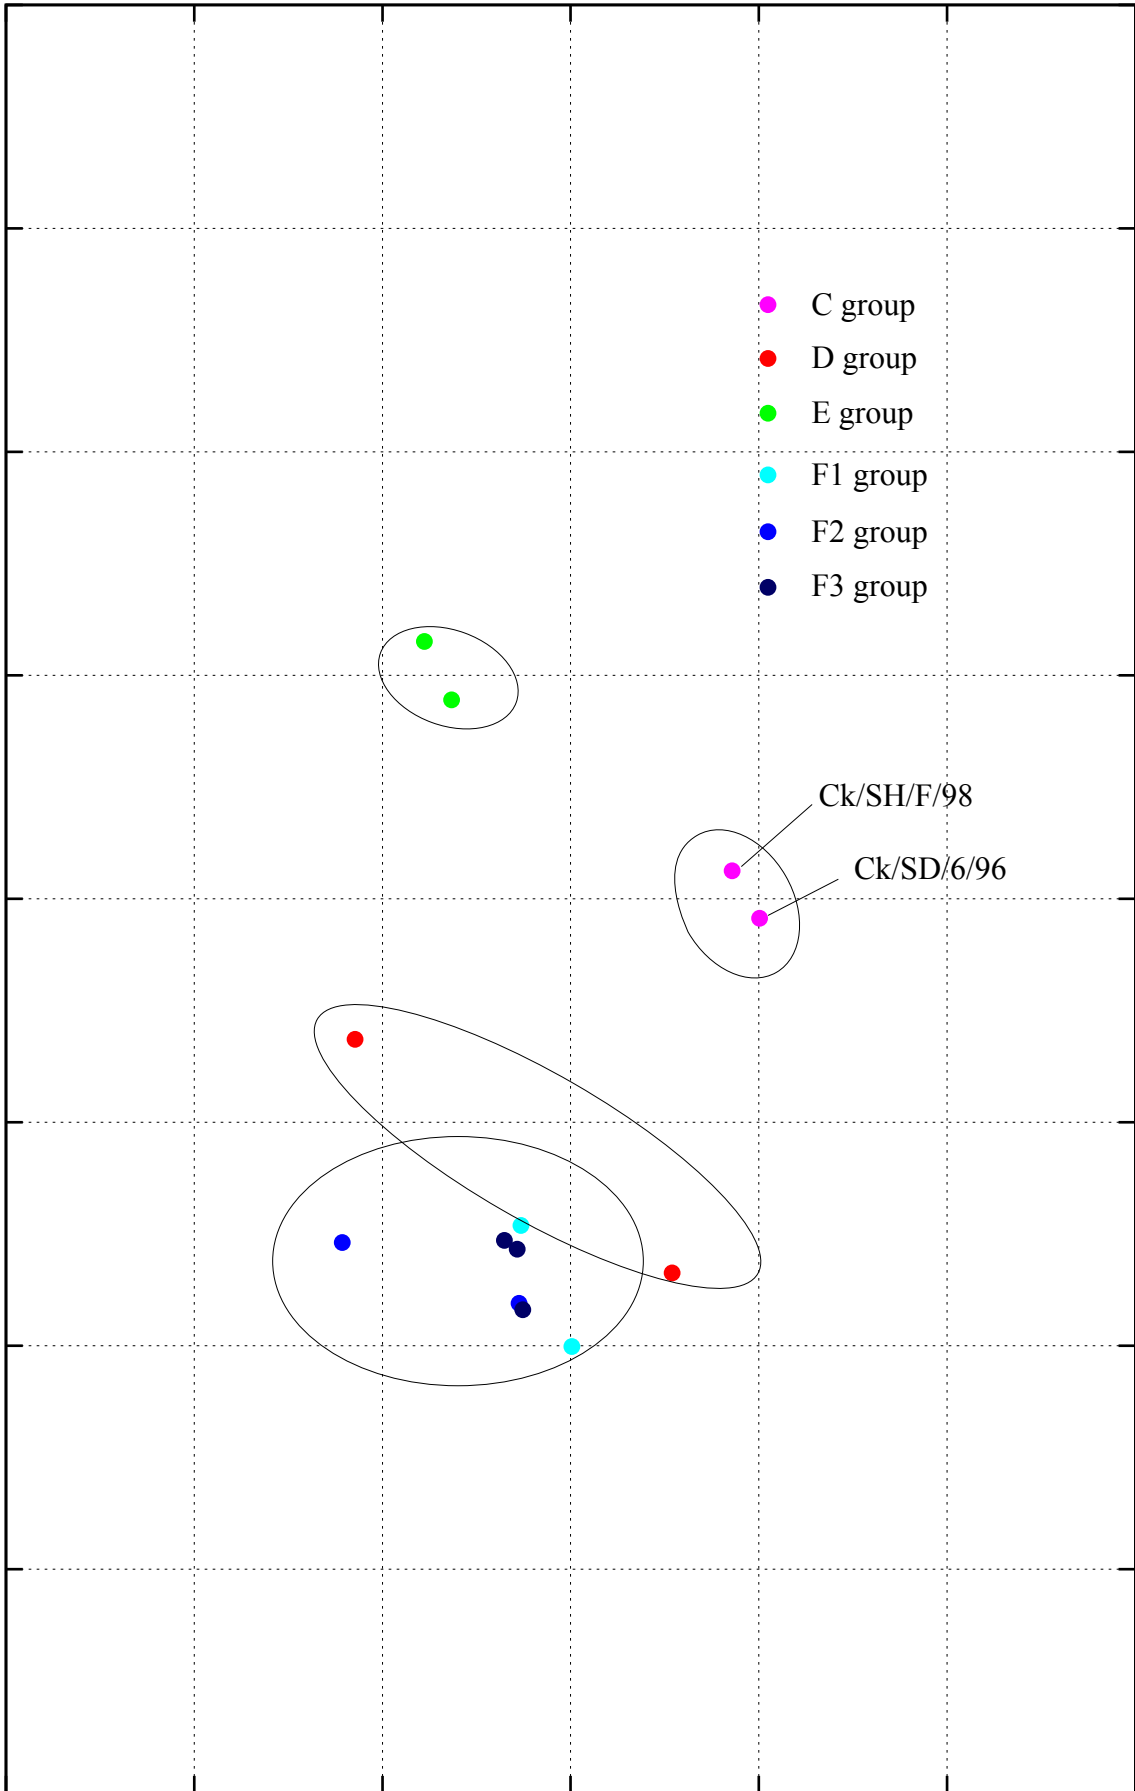

Supplement: NIHMS786088-supplement-1.pdf [file NIHMS786088-supplement-1.pdf]
